# Supplementary material for: Poly(ε-caprolactone)/Poly(3-hydroxybutyrate-co-3-hydroxyvalerate) Blend from Fused Deposition Modeling as Potential Cartilage Scaffolds
Source: Hindawi journal article supplement (doi:10.1155/2021/6689789), 2021-03-22
Supplement: f1 [file 6689789.f1.docx]

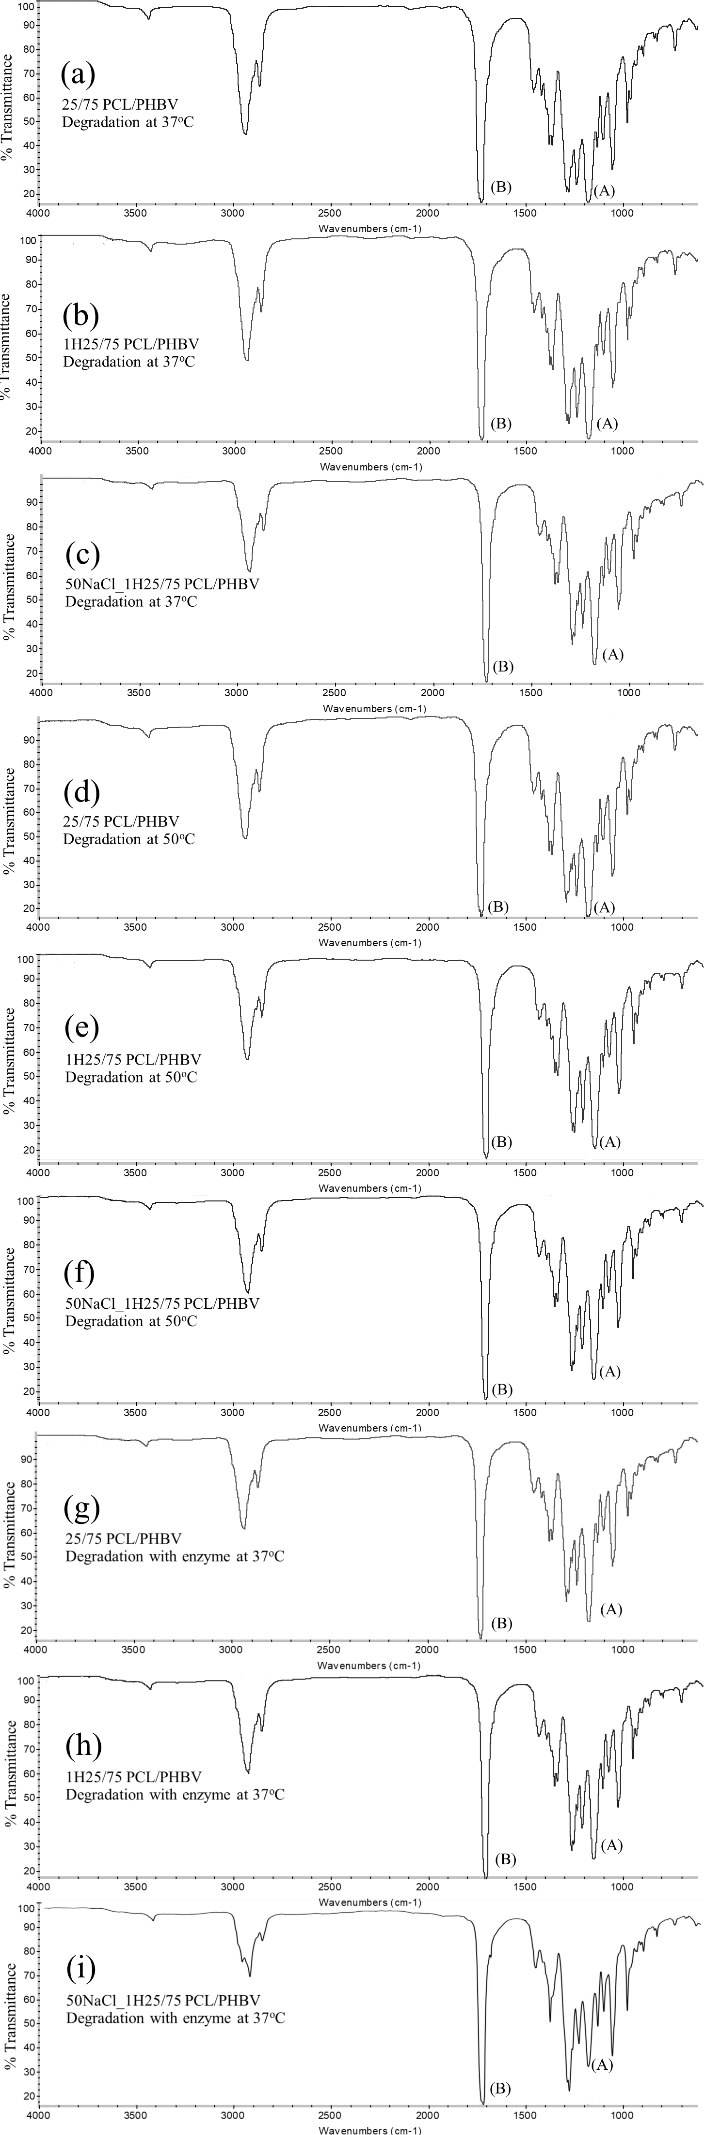


Figure S1: Infrared spectra of a) 25/75, b) 1H25/75, and c) 50NaCl_1H25/75 PCL/PHBV after 30 days of degradation in phosphate buffer at 37°C and the same scaffolds in d), e), and f) at 50°C, and g), h), i) with enzyme at 37°C.
